# Supplementary material for: Estimating the burden of cardiovascular risk in community dwellers over 40 years old in South Africa, Kenya, Burkina Faso and Ghana
Source: PubMed Central journal article supplement — BMJ Glob Health. 2021 Jan 21;6(1):e003499. doi: 10.1136/bmjgh-2020-003499 (PMC7825268; doi:10.1136/bmjgh-2020-003499), 2021-01-21
Supplement: bmjgh-2020-003499supp002.pdf [file bmjgh-2020-003499supp002.pdf]

**Supplementary Table 1.** Input and output variables from each of the 10-year cardiovascular disease prediction equations used in this manuscript.

|                                     | <b>Framingham (lab)</b>                                                                                                                                                                                                                   | <b>Framingham (office)</b> | <b>Globorisk (lab)</b>                                                                                                                                                                                                                   | <b>Globorisk (office)</b> | <b>WHO-CVD (lab)</b>                         | <b>WHO-CVD (office)</b> |
|-------------------------------------|-------------------------------------------------------------------------------------------------------------------------------------------------------------------------------------------------------------------------------------------|----------------------------|------------------------------------------------------------------------------------------------------------------------------------------------------------------------------------------------------------------------------------------|---------------------------|----------------------------------------------|-------------------------|
| <b>Output from calculator:</b>      | general risk of fatal or non-fatal CVD over 10 years<br>(coronary death, myocardial infarction, coronary insufficiency, angina, ischemic stroke, hemorrhagic stroke, transient ischemic attack, peripheral artery disease, heart failure) |                            | 10-year risk of fatal and non-fatal CVD.<br>Fatal:<br>death from ischemic heart disease or sudden cardiac death (ICD10 codes I20–I25) or death from stroke (ICD10 codes I60–I69).<br>non-fatal:(ICD10 codes I21–I22) or stroke (I60-I69) |                           | 10-year risk of fatal or non-fatal CV event. |                         |
| <b>Input Variable</b>               |                                                                                                                                                                                                                                           |                            |                                                                                                                                                                                                                                          |                           |                                              |                         |
| <i>Sex</i>                          | Y                                                                                                                                                                                                                                         | Y                          | Y                                                                                                                                                                                                                                        | Y                         | Y                                            | Y                       |
| <i>Age</i>                          | Y                                                                                                                                                                                                                                         | Y                          | Y                                                                                                                                                                                                                                        | Y                         | Y                                            | Y                       |
| <i>Currently smoking</i>            | Y                                                                                                                                                                                                                                         | Y                          | Y                                                                                                                                                                                                                                        | Y                         | Y                                            | Y                       |
| <i>Systolic blood pressure</i>      | Y                                                                                                                                                                                                                                         | Y                          | Y                                                                                                                                                                                                                                        | Y                         | Y                                            | Y                       |
| <i>Body Mass Index (BMI)</i>        |                                                                                                                                                                                                                                           | Y                          |                                                                                                                                                                                                                                          | Y                         |                                              | Y                       |
| <i>Total Cholesterol</i>            | Y                                                                                                                                                                                                                                         |                            | Y                                                                                                                                                                                                                                        |                           | Y                                            |                         |
| <i>HDL cholesterol</i>              | Y                                                                                                                                                                                                                                         |                            |                                                                                                                                                                                                                                          |                           |                                              |                         |
| <i>Diabetes Mellitus</i>            | Y                                                                                                                                                                                                                                         | Y                          |                                                                                                                                                                                                                                          |                           | Y                                            | Y                       |
| <i>Treatment for blood pressure</i> | Y                                                                                                                                                                                                                                         | Y                          |                                                                                                                                                                                                                                          |                           |                                              |                         |

**Supplementary Table 2.** Order of total population risk as calculated by each risk factor equation, by site

| Order of risk | Framingham (office) | Framingham (lab) | Globorisk (office) | Globorisk (lab) | WHO-CVD (office) | WHO-CVD (lab) |
|---------------|---------------------|------------------|--------------------|-----------------|------------------|---------------|
| 1             | Soweto              | Soweto           | Soweto             | Navrongo        | Soweto*          | Soweto**      |
| 2             | Agincourt           | Agincourt        | Agincourt          | Soweto          | Agincourt*       | Agincourt**   |
| 3             | Dikgale             | Dikgale          | Navrongo           | Agincourt       | Dikgale          | Dikgale       |
| 4             | Navrongo            | Nairobi          | Dikgale            | Dikgale         | Navrongo         | Navrongo      |
| 5             | Nairobi             | Navrongo         | Nanoro             | Nanoro          | Nairobi          | Nairobi       |
| 6             | Nanoro              | Nanoro           | Nairobi            | Nairobi         | Nanoro           | Nanoro        |

\*/\*\* equal risk
