# Supplementary material for: Estimating the burden of cardiovascular risk in community dwellers over 40 years old in South Africa, Kenya, Burkina Faso and Ghana
Source: PubMed Central journal article supplement — BMJ Glob Health. 2021 Jan 21;6(1):e003499. doi: 10.1136/bmjgh-2020-003499 (PMC7825268; doi:10.1136/bmjgh-2020-003499), 2021-01-21
Supplement: bmjgh-2020-003499supp003.pdf [file bmjgh-2020-003499supp003.pdf]

1- Agincourt

|                            | WHO-CVD (lab)      | WHO-CVD (office)   | Globorisk (lab)    | Globorisk (office) | Framingham (lipids) |
|----------------------------|--------------------|--------------------|--------------------|--------------------|---------------------|
| <b>Framingham (BMI)</b>    |                    |                    |                    |                    |                     |
| kappa (95%CI)              | 0.02 (0.12-0.29)*  | 0.03 (0.02-0.04)** | 0.41 (0.37-0.45)** | 0.61 (0.57-0.65)** | 0.53 (0.49-0.57)**  |
| Agreement %                | 58.7%              | 58.7%              | 71.8%              | 80.3%              | 76.7%               |
| Spearman's correlation     | 0.298**            | 0.350**            | 0.680**            | 0.762**            | 0.739**             |
| <b>Framingham (lipids)</b> |                    |                    |                    |                    |                     |
| kappa                      | 0.07 (0.05-0.09)** | 0.12 (0.08-0.15)** | 0.63 (0.59-0.68)** | 0.60 (0.56-0.65)** |                     |
| Agreement %                | 74.8%              | 75.6%              | 86.5%              | 83.9%              |                     |
| Spearman's correlation     | 0.355**            | 0.399**            | 0.355**            | 0.399**            |                     |
| <b>Globorisk (office)</b>  |                    |                    |                    |                    |                     |
| kappa                      | 0.07 (0.05-0.10)** | 0.08 (0.06-0.10)** | 0.59 (0.54-0.64)** |                    |                     |
| Agreement %                | 74.0%              | 73.6%              | 84.5%              |                    |                     |
| Spearman's correlation     | 0.339**            | 0.418**            | 0.710**            |                    |                     |
| <b>Globorisk (lab)</b>     |                    |                    |                    |                    |                     |
| kappa                      | 0.10 (0.07-0.13)** | 0.18 (0.14-0.23)** |                    |                    |                     |
| Agreement %                | 80.6%              | 81.9%              |                    |                    |                     |
| Spearman's correlation     | 0.401**            | 0.442**            |                    |                    |                     |
| <b>WHO-CVD (office)</b>    |                    |                    |                    |                    |                     |
| kappa                      | 0.56 (0.33-0.68)** |                    |                    |                    |                     |
| Agreement %                | 97.2%              |                    |                    |                    |                     |
| Spearman's correlation     | 0.595**            |                    |                    |                    |                     |

2- Dikale

|                            | WHO-CVD (lab)      | WHO-CVD (office)   | Globorisk (lab)    | Globorisk (office) | Framingham (lipids) |
|----------------------------|--------------------|--------------------|--------------------|--------------------|---------------------|
| <b>Framingham (BMI)</b>    |                    |                    |                    |                    |                     |
| kappa (95%CI)              | 0.04 (0.03-0.06)** | 0.04 (0.03-0.06)** | 0.45 (0.41-0.50)** | 0.57 (0.53-0.62)** | 0.57 (0.52-0.62)**  |
| Agreement %                | 66.5%              | 66.5%              | 77.1%              | 81.4%              | 81.0%               |
| Spearman's correlation     | 0.333**            | 0.321**            | 0.708**            | 0.764**            | 0.763**             |
| <b>Framingham (lipids)</b> |                    |                    |                    |                    |                     |
| kappa                      | 0.11 (0.08-0.15)** | 0.12 (0.08-0.16)** | 0.63 (0.58-0.68)** | 0.57 (0.52-0.62)** |                     |
| Agreement %                | 78.5%              | 78.7%              | 87.7%              | 84.5%              |                     |
| Spearman's correlation     | 0.384**            | 0.368**            | 0.384**            | 0.368**            |                     |
| <b>Globorisk (office)</b>  |                    |                    |                    |                    |                     |
| kappa                      | 0.12 (0.07-0.16)** | 0.09 (0.06-0.11)** | 0.61 (0.56-0.67)** |                    |                     |
| Agreement %                | 79.4%              | 78.8%              | 87.4%              |                    |                     |
| Spearman's correlation     | 0.349**            | 0.406**            | 0.703**            |                    |                     |
| <b>Globorisk (lab)</b>     |                    |                    |                    |                    |                     |
| kappa                      | 0.13 (0.09-0.17)** | 0.14 (0.10-0.19)** |                    |                    |                     |
| Agreement %                | 82.9%              | 83.2%              |                    |                    |                     |
| Spearman's correlation     | 0.445**            | 0.427**            |                    |                    |                     |
| <b>WHO-CVD (office)</b>    |                    |                    |                    |                    |                     |
| kappa                      | 0.58 (0.44-0.71)** |                    |                    |                    |                     |
| Agreement %                | 97.5%              |                    |                    |                    |                     |
| Spearman's correlation     | 0.608**            |                    |                    |                    |                     |

3- Nainobi

|                            | WHO-CVD (lab)      | WHO-CVD (office)   | Globorisk (lab)    | Globorisk (office) | Framingham (lipids) |
|----------------------------|--------------------|--------------------|--------------------|--------------------|---------------------|
| <b>Framingham (BMI)</b>    |                    |                    |                    |                    |                     |
| kappa (95%CI)              | 0.05 (0.03-0.07)** | 0.05 (0.03-0.07)** | 0.11 (0.09-0.15)** | 0.09 (0.07-0.12)** | 0.57 (0.53-0.61)**  |
| Agreement %                | 77.9%              | 77.8%              | 78.5%              | 78.2%              | 86.4%               |
| Spearman's correlation     | 0.277**            | 0.303**            | 0.377**            | 0.381**            | 0.692**             |
| <b>Framingham (lipids)</b> |                    |                    |                    |                    |                     |
| kappa                      | 0.11 (0.07-0.15)** | 0.12 (0.08-0.16)** | 0.19 (0.15-0.24)** | 0.20 (0.15-0.25)** |                     |
| Agreement %                | 85.6%              | 85.7%              | 86.0%              | 86.4%              |                     |
| Spearman's correlation     | 0.319**            | 0.331**            | 0.319**            | 0.331**            |                     |
| <b>Globorisk (office)</b>  |                    |                    |                    |                    |                     |
| kappa                      | 0.60 (0.48-0.72)** | 0.74 (0.64-0.84)** | 0.62 (0.52-0.72)** |                    |                     |
| Agreement %                | 98.3%              | 98.8%              | 97.7%              |                    |                     |
| Spearman's correlation     | 0.665**            | 0.775**            | 0.636**            |                    |                     |
| <b>Globorisk (lab)</b>     |                    |                    |                    |                    |                     |
| kappa                      | 0.59 (0.47-0.70)** | 0.55 (0.43-0.66)** |                    |                    |                     |
| Agreement %                | 98.0%              | 97.7%              |                    |                    |                     |
| Spearman's correlation     | 0.663**            | 0.610**            |                    |                    |                     |
| <b>WHO-CVD (office)</b>    |                    |                    |                    |                    |                     |
| kappa                      | 0.74 (0.62-0.86)** |                    |                    |                    |                     |
| Agreement %                | 99.2%              |                    |                    |                    |                     |
| Spearman's correlation     | 0.761**            |                    |                    |                    |                     |

4- Nanoro

|                            | WHO-CVD (lab)      | WHO-CVD (office)   | Globorisk (lab)    | Globorisk (office) | Framingham (lipids) |
|----------------------------|--------------------|--------------------|--------------------|--------------------|---------------------|
| <b>Framingham (BMI)</b>    |                    |                    |                    |                    |                     |
| kappa (95%CI)              | 0.01 (0.00-0.02)** | 0.01 (0.00-0.02)** | 0.32 (0.27-0.37)** | 0.49 (0.35-0.45)** | 0.48 (0.43-0.53)**  |
| Agreement %                | 81.9%              | 81.9%              | 85.2%              | 86.5%              | 87.6%               |
| Spearman's correlation     | 0.125**            | 0.137**            | 0.524**            | 0.581**            | 0.622**             |
| <b>Framingham (lipids)</b> |                    |                    |                    |                    |                     |
| kappa                      | 0.04 (0.00-0.08)** | 0.05 (0.01-0.09)*  | 0.19 (0.15-0.24)** | 0.50 (0.43-0.56)** |                     |
| Agreement %                | 91.5%              | 91.6%              | 93.4%              | 92.9%              |                     |
| Spearman's correlation     | 0.165**            | 0.180**            | 0.165**            | 0.180**            |                     |
| <b>Globorisk (office)</b>  |                    |                    |                    |                    |                     |
| kappa                      | 0.05 (0.05-0.09)** | 0.04 (0.01-0.08)*  | 0.62 (0.55-0.69)** |                    |                     |
| Agreement %                | 93.6%              | 93.5%              | 95.7%              |                    |                     |
| Spearman's correlation     | 0.194**            | 0.216**            | 0.654**            |                    |                     |
| <b>Globorisk (lab)</b>     |                    |                    |                    |                    |                     |
| kappa                      | 0.05 (0.01-0.09)*  | 0.07 (0.01-0.13)*  |                    |                    |                     |
| Agreement %                | 94.6%              | 94.8%              |                    |                    |                     |
| Spearman's correlation     | 0.216**            | 0.232**            |                    |                    |                     |
| <b>WHO-CVD (office)</b>    |                    |                    |                    |                    |                     |
| kappa                      | 0.73 (0.43-1.00)** |                    |                    |                    |                     |
| Agreement %                | 99.8%              |                    |                    |                    |                     |
| Spearman's correlation     | 0.730**            |                    |                    |                    |                     |

5- Navrogo

|                            | WHO-CVD (lab)      | WHO-CVD (office)   | Globorisk (lab)    | Globorisk (office) | Framingham (lipids) |
|----------------------------|--------------------|--------------------|--------------------|--------------------|---------------------|
| <b>Framingham (BMI)</b>    |                    |                    |                    |                    |                     |
| kappa (95%CI)              | 0.02 (0.01-0.23)** | 0.03 (0.02-0.04)** | 0.42 (0.38-0.46)** | 0.51 (0.47-0.54)** | 0.41 (0.37-0.45)**  |
| Agreement %                | 69.8%              | 69.8%              | 77.7%              | 79.7%              | 77.8%               |
| Spearman's correlation     | 0.207**            | 0.277**            | 0.641**            | 0.668**            | 0.655**             |
| <b>Framingham (lipids)</b> |                    |                    |                    |                    |                     |
| kappa                      | 0.08 (0.04-0.11)** | 0.15 (0.10-0.19)** | 0.57 (0.52-0.62)** | 0.49 (0.45-0.53)** |                     |
| Agreement %                | 85.4%              | 86.0%              | 88.3%              | 84.1%              |                     |
| Spearman's correlation     | 0.266**            | 0.340**            | 0.266**            | 0.340**            |                     |
| <b>Globorisk (office)</b>  |                    |                    |                    |                    |                     |
| kappa                      | 0.03 (0.02-0.05)** | 0.06 (0.03-0.07)** | 0.69 (0.65-0.73)** |                    |                     |
| Agreement %                | 78.2%              | 78.2%              | 90.0%              |                    |                     |
| Spearman's correlation     | 0.234**            | 0.321**            | 0.760**            |                    |                     |
| <b>Globorisk (lab)</b>     |                    |                    |                    |                    |                     |
| kappa                      | 0.04 (0.03-0.06)** | 0.10 (0.07-0.14)** |                    |                    |                     |
| Agreement %                | 83.4%              | 83.9%              |                    |                    |                     |
| Spearman's correlation     | 0.269**            | 0.335**            |                    |                    |                     |
| <b>WHO-CVD (office)</b>    |                    |                    |                    |                    |                     |
| kappa                      | 0.60 (0.46-0.75)** |                    |                    |                    |                     |
| Agreement %                | 98.8%              |                    |                    |                    |                     |
| Spearman's correlation     | 0.632**            |                    |                    |                    |                     |

6- Soweto

|                            | WHO-CVD (lab)      | WHO-CVD (office)   | Globorisk (lab)    | Globorisk (office) | Framingham (lipids) |
|----------------------------|--------------------|--------------------|--------------------|--------------------|---------------------|
| <b>Framingham (BMI)</b>    |                    |                    |                    |                    |                     |
| kappa (95%CI)              | 0.03 (0.02-0.37)** | 0.04 (0.03-0.05)** | 0.49 (0.45-0.52)** | 0.63 (0.61-0.68)** | 0.51 (0.47-0.54)**  |
| Agreement %                | 56.4%              | 56.7%              | 73.4%              | 81.0%              | 72.8%               |
| Spearman's correlation     | 0.333**            | 0.398**            | 0.746**            | 0.809**            | 0.687**             |
| <b>Framingham (lipids)</b> |                    |                    |                    |                    |                     |
| kappa                      | 0.06 (0.4-0.07)**  | 0.09 (0.07-0.11)** | 0.56 (0.52-0.59)** | 0.53 (0.49-0.56)** |                     |
| Agreement %                | 64.0%              | 63.7%              | 79.0%              | 76.4%              |                     |
| Spearman's correlation     | 0.347**            | 0.391**            | 0.347**            | 0.391**            |                     |
| <b>Globorisk (office)</b>  |                    |                    |                    |                    |                     |
| kappa                      | 0.07 (0.05-0.09)** | 0.08 (0.07-0.10)** | 0.61 (0.57-0.64)** |                    |                     |
| Agreement %                | 68.5%              | 68.2%              | 82.4%              |                    |                     |
| Spearman's correlation     | 0.349**            | 0.462**            | 0.749**            |                    |                     |
| <b>Globorisk (lab)</b>     |                    |                    |                    |                    |                     |
| kappa                      | 0.09 (0.07-0.11)** | 0.17 (0.13-0.20)** |                    |                    |                     |
| Agreement %                | 74.4%              | 75.8%              |                    |                    |                     |
| Spearman's correlation     | 0.422*             | 0.461**            |                    |                    |                     |
| <b>WHO-CVD (office)</b>    |                    |                    |                    |                    |                     |
| kappa                      | 0.51 (0.42-0.59)** |                    |                    |                    |                     |
| Agreement %                | 95.5%              |                    |                    |                    |                     |
| Spearman's correlation     | 0.545**            |                    |                    |                    |                     |

\*p<0.05  
\*\*p<0.0001

<0.4 poor  
0.41-0.60 moderate  
0.61-0.80 substantial  
>.80 excellent
