# Supplementary material for: Estimating the burden of cardiovascular risk in community dwellers over 40 years old in South Africa, Kenya, Burkina Faso and Ghana
Source: HighWire-hosted journal article supplement (doi:10.1136/bmjgh-2020-003499), 2021-01-01
Supplement: bmjgh-2020-003499supp004_data_supplement.pdf [file bmjgh-2020-003499supp004_data_supplement.pdf]

Z score (p-value)

| Framingham BMI v. WHO-CVD (lab)    |               |                | Framingham BMI v. WHO-CVD (office)    |               |                | Framingham BMI v. Glibersick (lab)   |               |                | Framingham BMI v. Glibersick (office)   |               |                | Framingham BMI v. Framingham (lab)   |               |                |
|------------------------------------|---------------|----------------|---------------------------------------|---------------|----------------|--------------------------------------|---------------|----------------|-----------------------------------------|---------------|----------------|--------------------------------------|---------------|----------------|
| Agreement                          | Disagreement  | Neurologist    | Agreement                             | Disagreement  | Neurologist    | Agreement                            | Disagreement  | Neurologist    | Agreement                               | Disagreement  | Neurologist    | Agreement                            | Disagreement  | Neurologist    |
| 1.05 (0.001)                       | 1.76 (0.001)  | 6.81 (0.001)   | 1.05 (0.001)                          | 1.76 (0.001)  | 6.81 (0.001)   | 1.05 (0.001)                         | 1.76 (0.001)  | 6.81 (0.001)   | 1.05 (0.001)                            | 1.76 (0.001)  | 6.81 (0.001)   | 1.05 (0.001)                         | 1.76 (0.001)  | 6.81 (0.001)   |
| -2.29 (0.001)                      | -3.66 (0.001) | -2.32 (0.001)  | -2.29 (0.001)                         | -3.66 (0.001) | -2.32 (0.001)  | -2.29 (0.001)                        | -3.66 (0.001) | -2.32 (0.001)  | -2.29 (0.001)                           | -3.66 (0.001) | -2.32 (0.001)  | -2.29 (0.001)                        | -3.66 (0.001) | -2.32 (0.001)  |
| -5.19 (0.001)                      | -5.96 (0.001) | -5.01 (0.001)  | -5.19 (0.001)                         | -5.96 (0.001) | -5.01 (0.001)  | -5.19 (0.001)                        | -5.96 (0.001) | -5.01 (0.001)  | -5.19 (0.001)                           | -5.96 (0.001) | -5.01 (0.001)  | -5.19 (0.001)                        | -5.96 (0.001) | -5.01 (0.001)  |
| 0.69 (0.333)                       | 1.03 (0.001)  | 2.67 (0.001)   | 0.69 (0.333)                          | 1.03 (0.001)  | 2.67 (0.001)   | 0.69 (0.333)                         | 1.03 (0.001)  | 2.67 (0.001)   | 0.69 (0.333)                            | 1.03 (0.001)  | 2.67 (0.001)   | 0.69 (0.333)                         | 1.03 (0.001)  | 2.67 (0.001)   |
| -0.84 (0.415)                      | -0.53 (0.572) | -0.53 (0.572)  | -0.84 (0.415)                         | -0.53 (0.572) | -0.53 (0.572)  | -0.84 (0.415)                        | -0.53 (0.572) | -0.53 (0.572)  | -0.84 (0.415)                           | -0.53 (0.572) | -0.53 (0.572)  | -0.84 (0.415)                        | -0.53 (0.572) | -0.53 (0.572)  |
| Framingham lipid v. WHO-CVD (lab)  |               |                | Framingham lipid v. WHO-CVD (office)  |               |                | Framingham lipid v. Glibersick (lab) |               |                | Framingham lipid v. Glibersick (office) |               |                | Framingham lipid v. Framingham (lab) |               |                |
| Agreement                          | Disagreement  | Neurologist    | Agreement                             | Disagreement  | Neurologist    | Agreement                            | Disagreement  | Neurologist    | Agreement                               | Disagreement  | Neurologist    | Agreement                            | Disagreement  | Neurologist    |
| 0.76 (0.001)                       | 1.11 (0.001)  | 0.81 (0.001)   | 0.76 (0.001)                          | 1.11 (0.001)  | 0.81 (0.001)   | 0.76 (0.001)                         | 1.11 (0.001)  | 0.81 (0.001)   | 0.76 (0.001)                            | 1.11 (0.001)  | 0.81 (0.001)   | 0.76 (0.001)                         | 1.11 (0.001)  | 0.81 (0.001)   |
| -2.79 (0.001)                      | -3.59 (0.001) | -1.81 (0.001)  | -2.79 (0.001)                         | -3.59 (0.001) | -1.81 (0.001)  | -2.79 (0.001)                        | -3.59 (0.001) | -1.81 (0.001)  | -2.79 (0.001)                           | -3.59 (0.001) | -1.81 (0.001)  | -2.79 (0.001)                        | -3.59 (0.001) | -1.81 (0.001)  |
| -5.87 (0.001)                      | -4.61 (0.001) | -5.17 (0.001)  | -5.87 (0.001)                         | -4.61 (0.001) | -5.17 (0.001)  | -5.87 (0.001)                        | -4.61 (0.001) | -5.17 (0.001)  | -5.87 (0.001)                           | -4.61 (0.001) | -5.17 (0.001)  | -5.87 (0.001)                        | -4.61 (0.001) | -5.17 (0.001)  |
| 0.87 (0.403)                       | 1.11 (0.001)  | 3.84 (0.001)   | 0.87 (0.403)                          | 1.11 (0.001)  | 3.84 (0.001)   | 0.87 (0.403)                         | 1.11 (0.001)  | 3.84 (0.001)   | 0.87 (0.403)                            | 1.11 (0.001)  | 3.84 (0.001)   | 0.87 (0.403)                         | 1.11 (0.001)  | 3.84 (0.001)   |
| -0.82 (0.423)                      | -0.53 (0.572) | -0.53 (0.572)  | -0.82 (0.423)                         | -0.53 (0.572) | -0.53 (0.572)  | -0.82 (0.423)                        | -0.53 (0.572) | -0.53 (0.572)  | -0.82 (0.423)                           | -0.53 (0.572) | -0.53 (0.572)  | -0.82 (0.423)                        | -0.53 (0.572) | -0.53 (0.572)  |
| Glibersick office v. WHO-CVD (lab) |               |                | Glibersick office v. WHO-CVD (office) |               |                | Glibersick lab v. WHO-CVD (lab)      |               |                | Glibersick lab v. WHO-CVD (office)      |               |                | Glibersick lab v. Framingham (lab)   |               |                |
| Agreement                          | Disagreement  | Neurologist    | Agreement                             | Disagreement  | Neurologist    | Agreement                            | Disagreement  | Neurologist    | Agreement                               | Disagreement  | Neurologist    | Agreement                            | Disagreement  | Neurologist    |
| 0.38 (0.750)                       | 0.71 (0.001)  | 1.34 (0.001)   | 0.38 (0.750)                          | 0.71 (0.001)  | 1.34 (0.001)   | 0.38 (0.750)                         | 0.71 (0.001)  | 1.34 (0.001)   | 0.38 (0.750)                            | 0.71 (0.001)  | 1.34 (0.001)   | 0.38 (0.750)                         | 0.71 (0.001)  | 1.34 (0.001)   |
| -3.27 (0.001)                      | -3.30 (0.001) | -17.90 (0.001) | -3.27 (0.001)                         | -3.30 (0.001) | -17.90 (0.001) | -3.27 (0.001)                        | -3.30 (0.001) | -17.90 (0.001) | -3.27 (0.001)                           | -3.30 (0.001) | -17.90 (0.001) | -3.27 (0.001)                        | -3.30 (0.001) | -17.90 (0.001) |
| -4.67 (0.001)                      | -4.55 (0.001) | -19.04 (0.001) | -4.67 (0.001)                         | -4.55 (0.001) | -19.04 (0.001) | -4.67 (0.001)                        | -4.55 (0.001) | -19.04 (0.001) | -4.67 (0.001)                           | -4.55 (0.001) | -19.04 (0.001) | -4.67 (0.001)                        | -4.55 (0.001) | -19.04 (0.001) |
| 0.23 (0.778)                       | 0.71 (0.001)  | 1.34 (0.001)   | 0.23 (0.778)                          | 0.71 (0.001)  | 1.34 (0.001)   | 0.23 (0.778)                         | 0.71 (0.001)  | 1.34 (0.001)   | 0.23 (0.778)                            | 0.71 (0.001)  | 1.34 (0.001)   | 0.23 (0.778)                         | 0.71 (0.001)  | 1.34 (0.001)   |
| -0.23 (0.778)                      | -0.71 (0.001) | -1.34 (0.001)  | -0.23 (0.778)                         | -0.71 (0.001) | -1.34 (0.001)  | -0.23 (0.778)                        | -0.71 (0.001) | -1.34 (0.001)  | -0.23 (0.778)                           | -0.71 (0.001) | -1.34 (0.001)  | -0.23 (0.778)                        | -0.71 (0.001) | -1.34 (0.001)  |
| Glibersick lab v. WHO-CVD (lab)    |               |                | Glibersick lab v. WHO-CVD (office)    |               |                | Glibersick lab v. Framingham (lab)   |               |                | Glibersick lab v. Framingham (office)   |               |                | Glibersick lab v. Framingham (lab)   |               |                |
| Agreement                          | Disagreement  | Neurologist    | Agreement                             | Disagreement  | Neurologist    | Agreement                            | Disagreement  | Neurologist    | Agreement                               | Disagreement  | Neurologist    | Agreement                            | Disagreement  | Neurologist    |
| 0.70 (0.478)                       | 0.71 (0.001)  | 1.34 (0.001)   | 0.70 (0.478)                          | 0.71 (0.001)  | 1.34 (0.001)   | 0.70 (0.478)                         | 0.71 (0.001)  | 1.34 (0.001)   | 0.70 (0.478)                            | 0.71 (0.001)  | 1.34 (0.001)   | 0.70 (0.478)                         | 0.71 (0.001)  | 1.34 (0.001)   |
| -4.22 (0.001)                      | -5.67 (0.001) | -16.12 (0.001) | -4.22 (0.001)                         | -5.67 (0.001) | -16.12 (0.001) | -4.22 (0.001)                        | -5.67 (0.001) | -16.12 (0.001) | -4.22 (0.001)                           | -5.67 (0.001) | -16.12 (0.001) | -4.22 (0.001)                        | -5.67 (0.001) | -16.12 (0.001) |
| -5.86 (0.001)                      | -7.04 (0.001) | -18.27 (0.001) | -5.86 (0.001)                         | -7.04 (0.001) | -18.27 (0.001) | -5.86 (0.001)                        | -7.04 (0.001) | -18.27 (0.001) | -5.86 (0.001)                           | -7.04 (0.001) | -18.27 (0.001) | -5.86 (0.001)                        | -7.04 (0.001) | -18.27 (0.001) |
| 0.55 (0.583)                       | 0.71 (0.001)  | 1.34 (0.001)   | 0.55 (0.583)                          | 0.71 (0.001)  | 1.34 (0.001)   | 0.55 (0.583)                         | 0.71 (0.001)  | 1.34 (0.001)   | 0.55 (0.583)                            | 0.71 (0.001)  | 1.34 (0.001)   | 0.55 (0.583)                         | 0.71 (0.001)  | 1.34 (0.001)   |
| -0.55 (0.583)                      | -0.71 (0.001) | -1.34 (0.001)  | -0.55 (0.583)                         | -0.71 (0.001) | -1.34 (0.001)  | -0.55 (0.583)                        | -0.71 (0.001) | -1.34 (0.001)  | -0.55 (0.583)                           | -0.71 (0.001) | -1.34 (0.001)  | -0.55 (0.583)                        | -0.71 (0.001) | -1.34 (0.001)  |
| WHO office v. WHO-CVD (lab)        |               |                | WHO office v. WHO-CVD (office)        |               |                | WHO office v. Framingham (lab)       |               |                | WHO office v. Framingham (office)       |               |                | WHO office v. Framingham (lab)       |               |                |
| Agreement                          | Disagreement  | Neurologist    | Agreement                             | Disagreement  | Neurologist    | Agreement                            | Disagreement  | Neurologist    | Agreement                               | Disagreement  | Neurologist    | Agreement                            | Disagreement  | Neurologist    |
| 2.09 (0.038)                       | 2.02 (0.032)  | 11.41 (0.001)  | 2.09 (0.038)                          | 2.02 (0.032)  | 11.41 (0.001)  | 2.09 (0.038)                         | 2.02 (0.032)  | 11.41 (0.001)  | 2.09 (0.038)                            | 2.02 (0.032)  | 11.41 (0.001)  | 2.09 (0.038)                         | 2.02 (0.032)  | 11.41 (0.001)  |
| 1.63 (0.021)                       | 1.09 (0.244)  | 7.82 (0.001)   | 1.63 (0.021)                          | 1.09 (0.244)  | 7.82 (0.001)   | 1.63 (0.021)                         | 1.09 (0.244)  | 7.82 (0.001)   | 1.63 (0.021)                            | 1.09 (0.244)  | 7.82 (0.001)   | 1.63 (0.021)                         | 1.09 (0.244)  | 7.82 (0.001)   |
| 8.85 (0.001)                       | 7.85 (0.001)  | 2.23 (0.038)   | 8.85 (0.001)                          | 7.85 (0.001)  | 2.23 (0.038)   | 8.85 (0.001)                         | 7.85 (0.001)  | 2.23 (0.038)   | 8.85 (0.001)                            | 7.85 (0.001)  | 2.23 (0.038)   | 8.85 (0.001)                         | 7.85 (0.001)  | 2.23 (0.038)   |
| 0.50 (0.612)                       | 0.50 (0.612)  | 0.50 (0.612)   | 0.50 (0.612)                          | 0.50 (0.612)  | 0.50 (0.612)   | 0.50 (0.612)                         | 0.50 (0.612)  | 0.50 (0.612)   | 0.50 (0.612)                            | 0.50 (0.612)  | 0.50 (0.612)   | 0.50 (0.612)                         | 0.50 (0.612)  | 0.50 (0.612)   |
